# Supplementary material
Source: Springer Nature journal article supplement (https://www.springermedizin.de/resource/supplementary/12879_2011_1746_MOESM3_ESM.pdf/9443326)

**3A**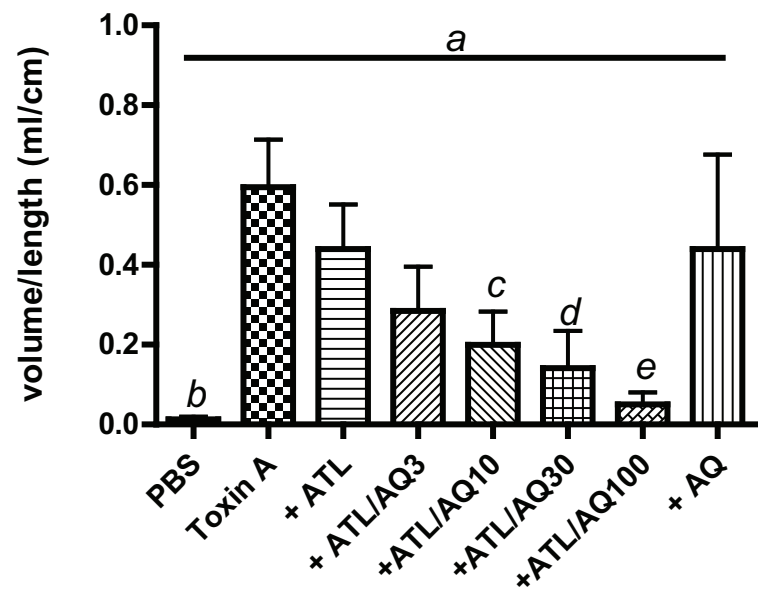**3B**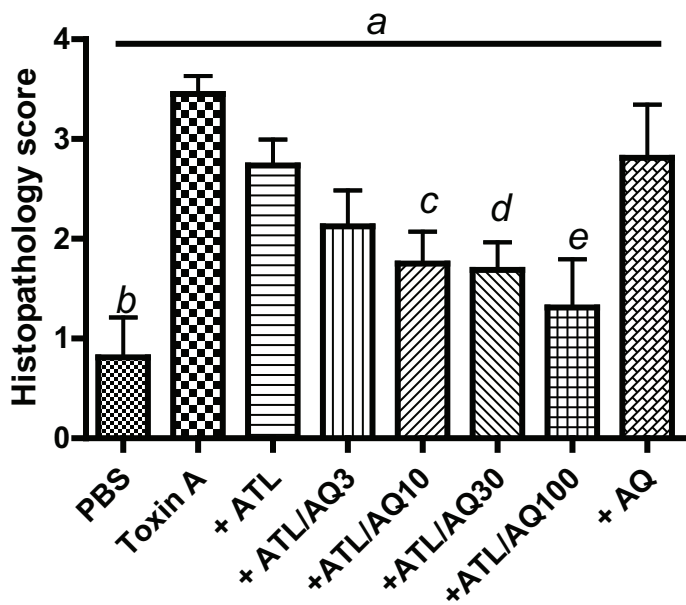

Supplement: MOESM3 [file 9443326]
